# Supplementary material for: An Allele of Arabidopsis COI1 with Hypo- and Hypermorphic Phenotypes in Plant Growth, Defence and Fertility
Source: PubMed Central journal article supplement (PMC3559596; doi:10.1371/journal.pone.0055115), 2013-01-30
Supplement: pone.0055115.s001.pdf [file pone.0055115.s001.pdf]

**Table S1 – Sequencing primers of *coil-40* and molecular marker**

| <b>Primer</b>    | <b>Sequence</b>             |
|------------------|-----------------------------|
| COI1-40 CDS1 F   | GATCTGCGACCTCGATTTCAA       |
| COI1-40 CDS1 R   | AGCAAATCCAGCTTTCGGATT       |
| COI1-40 CDS2 F   | TTGAATGAGGATATTGGAATGCC     |
| COI1-40 CDS2 R   | GAAACCCCAAAACTCGAGACTAAA    |
| <i>coil-40</i> F | GATCTGCGACCTCGATTTCAA       |
| <i>coil-40</i> R | CGATCTTTCGGGTCAGTTA         |
| C2-12916335 F    | AAAAAGCTTCCCGGACTTTC        |
| C2-12916335 R    | CAAGTGTATTAGAATCCAAGCAA     |
| C4-102622254 F   | TGAAACAGCGTGTGAAGATTT       |
| C4-102622254 R   | AATAACAGTTTGAGAGTTTTAGAGCAA |
