# Supplementary material for: An Allele of Arabidopsis COI1 with Hypo- and Hypermorphic Phenotypes in Plant Growth, Defence and Fertility
Source: PubMed Central journal article supplement (PMC3559596; doi:10.1371/journal.pone.0055115), 2013-01-30
Supplement: pone.0055115.s009.pdf [file pone.0055115.s009.pdf]

**EXPERIMENTAL DESIGN**

Definition of experimental and control groups

Number within each group

Assay carried out by core lab or investigator's lab?

Acknowledgement of authors' contributions

**SAMPLE**

Description

Volume/mass of sample processed

Microdissection or macrodissection

Processing procedure

If frozen - how and how quickly?

If fixed - with what, how quickly?

Sample storage conditions and duration (especially for FFPE samples)

Experimental design is described in materials and methods. Two lab members carried out all the procedures in our lab.

Whole seedlings plants of ten days-old grown *in vitro*, in media supplemented with or without 50  $\mu$ M of MeJA, were collected in 2mL Eppendorf® tubes and immediately frozen in liquid nitrogen. All samples were stored at -80°C in a lab freezer during no more than a week before they were processed.

**NUCLEIC ACID EXTRACTION**

Procedure and/or instrumentation

Name of kit and details of any modifications

Source of additional reagents used

Details of DNase or RNase treatment

Contamination assessment (DNA or RNA)

Nucleic acid quantification

Instrument and method

Purity (A260/A280)

Yield

RNA integrity method/instrument

RIN/RQI or Cq of 3' and 5' transcripts

Electrophoresis traces

Inhibition testing (Cq dilutions, spike or other)

All samples were frozen-grinded and the RNA was isolated using Trizol®. The protocol of extraction was according to manufacture's procedures sheet. The RNA was then resuspended in 20 $\mu$ L of DEPC ddH<sub>2</sub>O. RNA obtained was treated with DNase I RNase free (Fermentas), and samples were checked on a 2% agarose gel stained with ethidium bromide. Contamination was assessed by a no RT control in the qPCR reaction.

RNA quantification was performed using a Thermo Nanodrop and 1  $\mu$ L of each sample was analyzed. The A260/280 and the A260/230 ratios were between 1,9 and 2 for all samples. An average of 1500  $\mu$ g/ $\mu$ L was obtained for all of them.

The RNA integrity was checked on a 2% agarose gel stained with ethidium bromide.

| <b>REVERSE TRANSCRIPTION</b>                             |
|----------------------------------------------------------|
| Complete reaction conditions                             |
| Amount of RNA and reaction volume                        |
| Priming oligonucleotide (if using GSP) and concentration |
| Reverse transcriptase and concentration                  |
| Temperature and time                                     |
| Manufacturer of reagents and catalogue numbers           |
| Cqs with and without RT                                  |
| Storage conditions of cDNA                               |

cDNA was synthesized using RevertAid™ Premium First Strand cDNA Synthesis Kit (Fermentas) from 2  $\mu$ g of RNA. Random hexamers were used. All the procedures were according to the manufacture's recommendations.

For all cDNAs, Cq values were about: ACT: 23.39; ELF: 21.46; PDF1.2: 27.31; VSP1: 24.65; COI1: 25.64; ASA1: 24.64; MYC2: 24.99; PAP1: 29.09; PAP2: 29.84. Without RT no amplification was detected.

All cDNA samples were stored at -80°C.

| <b>qPCR TARGET INFORMATION</b>                            |
|-----------------------------------------------------------|
| If multiplex, efficiency and LOD of each assay.           |
| Sequence accession number                                 |
| Location of amplicon                                      |
| Amplicon length                                           |
| <i>In silico</i> specificity screen (BLAST, etc)          |
| Pseudogenes, retropseudogenes or other homologs?          |
| Sequence alignment                                        |
| Secondary structure analysis of amplicon                  |
| Location of each primer by exon or intron (if applicable) |
| What splice variants are targeted?                        |

Multiplex qPCR was not performed.

The sequence accession numbers are:

ASA1: NM\_120655; COI1: NM\_129552 ; PAP1: NM\_104541; PAP2: NM\_105310; MYC2: NM\_102998 ; VSP1: NM\_122387 ; ACT2: NM\_112764; ACT8: NM\_103814; EF1 $\alpha$ : NM\_125432.

Amplicon lengths are: ACT2: 108 bp; ACT8: 107 bp; EF1 $\alpha$ : 76 bp MYC2: 76 bp; VSP1: 65 bp; ASA1: 140 bp; COI1: 91 bp; PAP1: 627 bp; PAP2: 448 bp.

Primers were designed using Primer Express<sup>®</sup>. Specificity was checked performing BLAST. They were mapped in exons (where possible spanning an intron) or UTR regions. No splice variants were targeted.

| <b>qPCR OLIGONUCLEOTIDES</b>               |
|--------------------------------------------|
| Primer sequences                           |
| RTPrimerDB Identification Number           |
| Probe sequences                            |
| Location and identity of any modifications |
| Manufacturer of oligonucleotides           |
| Purification method                        |

| <b>Primer</b>  | <b>Sequence</b>          |
|----------------|--------------------------|
| PAP1 F[1]      | TTGGTTCCTGAAGCGACGAC     |
| PAP1 R[1]      | GTCAAAAGCCAAGGTGTCCC     |
| PAP2 F[1]      | TTGGTTCCTGAAGCGACGAC     |
| PAP2 R[1]      | CAACGTCAAACGCCAAAGTG     |
| VSP1 F[2]      | CACTGTCGAGAATCTCAAGGCTG  |
| VSP1 R[2]      | CGTTTGGCTTGAGTATGAGATGC  |
| ASA1 F[3]      | GTAGAGAAGCTTATGAACATCGA  |
| ASA1 R[3]      | GGTGCACCACTAACTGTTCCCAC  |
| MYC2 F[4]      | TCATACGACGGTTGCCAGAA     |
| MYC2 R[4]      | AGCAACGTTTACAAGCTTTGATTG |
| COI1 F         | CCATTGTACGCTTATCCAAAAGTG |
| COI1 R         | CTGTCAAGGACCTCTAGACCC    |
| ACTIN2/8 F     | GGTAACATTGTGCTCAGTGGT    |
| ACTIN2/8 R     | AACGACCTTATCTTCATGCTG    |
| EF1 $\alpha$ F | TGAGCACGCTCTTCTTGCTTTCA  |
| EF1 $\alpha$ R | GGTGGTGGCATCCATCTTGTTACA |

All primers were synthesized by Sigma-Aldrich. No modifications were selected. All were fully deprotected and desalted.

| <b>qPCR PROTOCOL</b>                                      |
|-----------------------------------------------------------|
| Complete reaction conditions                              |
| Reaction volume and amount of cDNA/DNA                    |
| Primer, (probe), Mg <sup>++</sup> and dNTP concentrations |
| Polymerase identity and concentration                     |
| Buffer/kit identity and manufacturer                      |
| Exact chemical constitution of the buffer                 |

|                                                 |
|-------------------------------------------------|
| Additives (SYBR Green I, DMSO, etc.)            |
| Manufacturer of plates/tubes and catalog number |
| Complete thermocycling parameters               |
| Reaction setup (manual/robotic)                 |
| Manufacturer of qPCR instrument                 |

All qPCR reaction had a volume of 20 $\mu$ L with 1 $\mu$ L of cDNA at a concentration of 600ng/ $\mu$ L. Primers concentration was 0.2 $\mu$ M. The buffer used was Power SYBR Green PCR Master Mix (Applied Biosystems).

MicroAmp® Optical 96-Well Reaction Plates were used.

Thermocycling parameters were:

50°C 2 min

95°C 10 min

95°C 15 sec|

60°C 1 min | 40 cycles

95°C 10 sec|

60°C 20 sec| Dissociation step

95°C 15 sec|

The reaction setup was manual and the qPCR instrument was an ABI PRISM® 7000 Sequence Detection System.

| <b>qPCR VALIDATION</b>                                   |
|----------------------------------------------------------|
| Evidence of optimisation (from gradients)                |
| Specificity (gel, sequence, melt, or digest)             |
| For SYBR Green I, Cq of the NTC                          |
| Standard curves with slope and y-intercept               |
| PCR efficiency calculated from slope                     |
| Confidence interval for PCR efficiency or standard error |
| r <sup>2</sup> of standard curve                         |
| Linear dynamic range                                     |
| Cq variation at lower limit                              |
| Confidence intervals throughout range                    |
| Evidence for limit of detection                          |
| If multiplex, efficiency and LOD of each assay.          |

The specificity of the amplification products have been confirmed by size estimations on a 1.5% agarose gel and by analyzing their melting curves. Without a template, no Cq could be determined since it never passed the threshold line.

| Gene         | Efficiency | Slope | Y-Intercept | R    |
|--------------|------------|-------|-------------|------|
| ASA1         | 1.885      | 0.275 | -4.359      | 0.99 |
| MYC2         | 1.875      | 0.273 | -1.584      | 0.99 |
| VSP1         | 1.819      | 0.260 | -4.056      | 0.99 |
| PAP1         | 1.711      | 0.233 | -5.208      | 0.99 |
| PAP2         | 1.693      | 0.299 | -4.837      | 0.99 |
| COH1         | 1.829      | 0.262 | -4.303      | 0.99 |
| ACT 2/8      | 1,903      | 0,279 | -0,877      | 0.99 |
| EF1 $\alpha$ | 1,777      | 0,248 | -0.183      | 0.99 |

| DATA ANALYSIS                                         |
|-------------------------------------------------------|
| qPCR analysis program (source, version)               |
| Cq method determination                               |
| Outlier identification and disposition                |
| Results of NTCs                                       |
| Justification of number and choice of reference genes |
| Description of normalisation method                   |
| Number and concordance of biological replicates       |
| Number and stage (RT or qPCR) of technical replicates |
| Repeatability (intra-assay variation)                 |
| Reproducibility (inter-assay variation, %CV)          |
| Power analysis                                        |
| Statistical methods for result significance           |
| Software (source, version)                            |
| Cq or raw data submission using RDML                  |

The results were analyzed using the linregPCR software. The program determines baseline fluorescence and does a baseline subtraction. Then a Window-of-Linearity is set and PCR efficiencies per sample are calculated. With the mean PCR efficiency per amplicon, the Cq value per sample and the fluorescence threshold set to determine the Cq, the starting concentration per sample, expressed in arbitrary fluorescence units, is calculated.

Justification of number and choice of reference genes: these 3 genes have shown robust results in previous experiments in our lab.

Description of normalization method: 3 endogenous reference genes

Number and concordance of biological replicates: 3

Number and stage (RT or qPCR) of technical replicates: each plate had 3 technical replicates per gene and genotype.

Repeatability (intra-assay variation): Results showed an average 0.5 units of variation between technical replicates with a maximum of less than 1 unit.
